# Supplementary material
Source: PubMed Central journal article supplement (PMC1489917)
Supplement: plntphys_pp.106.077818v2_1.pdf [file plntphys_pp.106.077818v2_1.pdf]

## Supplemental Figure Legends

### **Supplemental 1.** Southern blot analysis of *Ds* insertion in *rpa-1* plants.

Genomic DNA extracted from homozygous (*Ds/Ds*) and heterozygous (*Ds/+*) plants were digested with *EcoRI* and gel-fractionated. The blot was hybridized with *Ds* 5' probe shown in lower panel.

### **Supplemental 2.** RT-PCR analysis of *RPA* expression in *rpa-1* and *rpa-2*.

RNA was extracted from inflorescence and root in mutant and wild type as indicated and first reverse-transcribed with AMV reverse transcriptase, then PCR amplification was performed. Col: *Columbia* ecotype; Ler: *Landsberg* ecotype. Note faint band is visible in *rpa-2* inflorescence.

### **Supplemental 3-1.** RT-PCR analysis of the Class II ARFGAP family.

RNA was extracted from tissues of *Landsberg* wild type as indicated and first reverse-transcribed with AMV reverse transcriptase, then PCR amplification was performed. *ACTIN2* was used as internal control.

### **Supplemental 3-2.** Root hair phenotypes of double mutants

- (A) A photograph showing root hairs in *A. thaliana* (*Ler*) wild type.
- (B) A photograph showing root hairs in *rpa-1* mutant.
- (C) A photograph showing root hairs in *rpa-1/at5g54310* double mutant.
- (D) A photograph showing root hairs in *rpa-1/at2g37550* double mutant.
- (E) A photograph showing root hairs in *rpa-1/at4g17890* double mutant.
- (F) A photograph showing root hairs in *rpa-1/at3g53710* double mutant.
- (G) A photograph showing root hairs in *rpa-1/at5g46750* double mutant.

Scale bar: 20 $\mu$ m.
